# Supplementary material for: Experimental and mathematical insights on the interactions between poliovirus and a defective interfering genome
Source: PLOS journal article supplement (doi:10.1371/journal.ppat.1009277), 2021-09-27

### Dually transfected cell

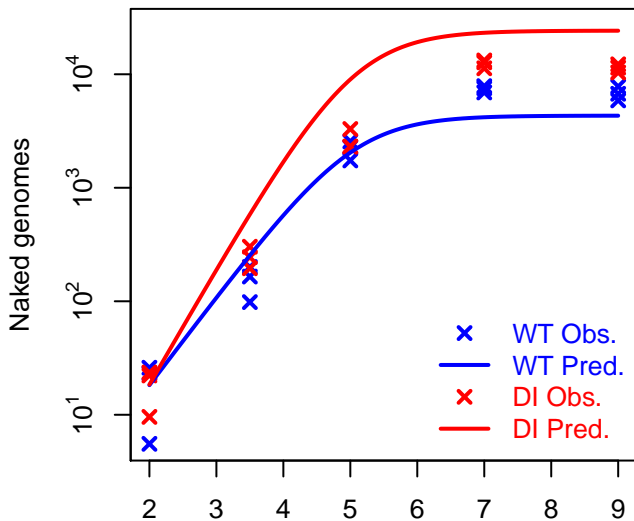

### Singly transfected cell

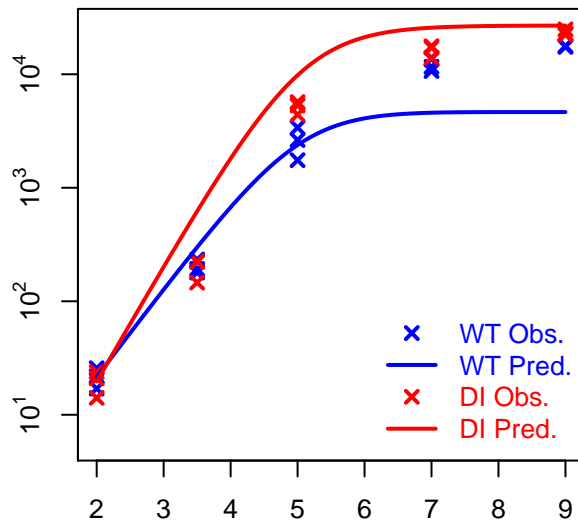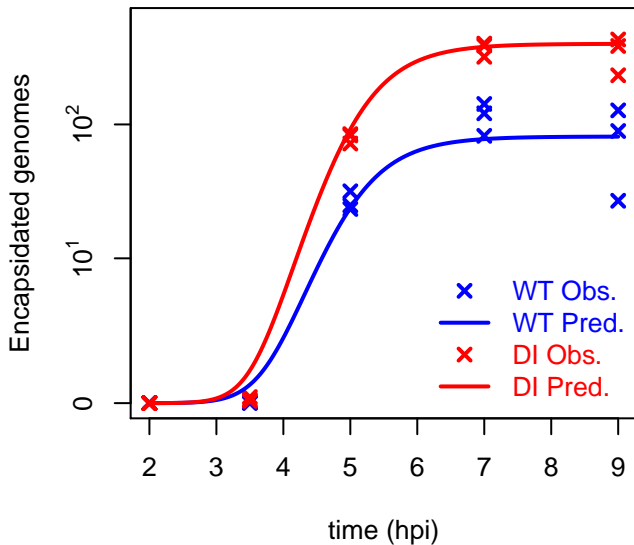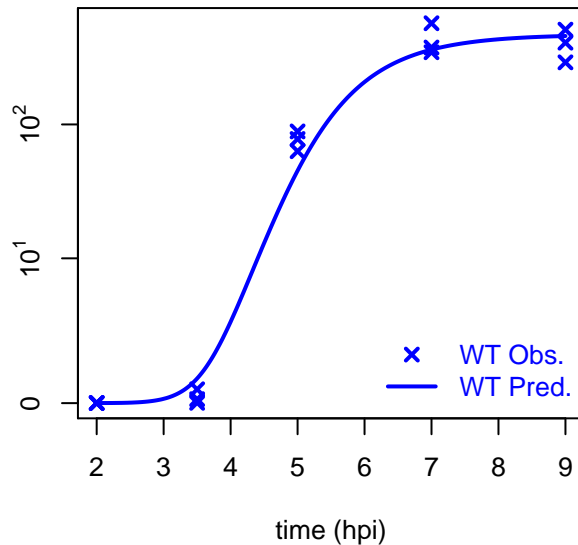

Supplement: S6 (10.1371/journal.ppat.1009277.s006) [file journal.ppat.1009277.s006]
